# Supplementary material for: Fluvoxamine for Outpatient Management of COVID-19 to Prevent Hospitalization: A Systematic Review and Meta-analysis
Source: PubMed Central journal article supplement (PMC8987902; doi:10.1001/jamanetworkopen.2022.6269), 2022-04-06
Supplement: jamanetwopen-e226269-s001.pdf [file jamanetwopen-e226269-s001.pdf]

## Supplemental Online Content

Lee TC, Vigod S, Bortolussi-Courval É, et al. Fluvoxamine for outpatient management of COVID-19 to prevent hospitalization: a systematic review and meta-analysis. *JAMA Netw Open*. 2022;5(4):e226269. doi:10.1001/jamanetworkopen.2022.6269

**eMethods.** Statistical Code

**eTable 1.** Details of Randomized Controlled Trials Identified in Search of Registry

**eFigure 1.** Forest Plot of Bayesian Analysis With Weakly Neutral Prior

**eFigure 2.** Forest Plot of Bayesian Analysis With Moderately Optimistic Prior

**eTable 2.** Considerations for Relative Contraindications to Fluvoxamine

This supplemental material has been provided by the authors to give readers additional information about their work.

## **eMethods.** Statistical Code

### *R code*

```
#add the libraries which are required (bayesmeta will add its dependencies)

library(bayesmeta)

library(readxl)

#Import the data

Fluvox <- read_excel("Fluvox.xlsx")

#Set the seed to Jenny's number

set.seed(8675039)

#Using escalc from the metafor package prepare the data for meta analysis

flu.es <- escalc(measure="RR", ai=fh, n1i=ft, ci=ph, n2i=pt, slab=Study, data=Fluvox)

#Weak neutral prior

ma02 <- bayesmeta(y = flu.es[, "yi"], sigma = sqrt(flu.es[, "vi"]), labels = flu.es[, "Study"],
mu.prior.mean = 0, mu.prior.sd = 0.355, tau.prior = function(t){dhalfcauchy(t, scale=0.1)})

#moderately optimistic prior

ma03 <- bayesmeta(y = flu.es[, "yi"], sigma = sqrt(flu.es[, "vi"]), labels = flu.es[, "Study"],
mu.prior.mean = -0.41, mu.prior.sd = 0.4, tau.prior = function(t){dhalfcauchy(t, scale=0.1)})

#Generate forest plots and obtain the point estimate and 95%CI from them

forestplot(ma02, exponentiate=TRUE)

forestplot(ma03, exponentiate=TRUE)

#Obtain the approximate weights

ma02$weights

ma03$weights
```

## *STATA Code*

*/\*STATA was used for two tasks. To conduct the frequentist meta-analysis and to create the probability density plots. This is provided for transparency, but no warranty or support is implied\*/*

*/\*To conduct the frequentist meta-analysis with metan you need to create the following variables study, fluvoxaminehospitalization, placebohospitalization, fluvoxaminethospitalization, and placebohospitalization and give them the appropriate values from the source data as presented in Figure 2. The command to regenerate the figure is below. \*/*

```
metan fluvoxaminehospitalization fluvoxaminethospitalization placebohospitalization  
placebohospitalization , favours(Fluvoxamine better # Placebo better) counts  
label(namevar=study) model(reml) forestplot(range(0.25 4) xlabel(0.25 0.5 1 2 4))  
group2(Fluvoxamine)
```

*/\*Create the probability density graphs\*/*

*/\*Generate 100000 simulated patients\*/*

```
clear  
set obs 100000  
set seed 8675309  
gen var1=_n
```

*/\*Generate variables representing the RR and bounds of 95%CI from the optimistic (opt), weak neutral (called skep below) \*/*

```
gen opt=0.73  
gen lci_opt=0.53  
gen uci_opt=1.01  
gen skep=0.78  
gen lci_skep=0.58  
gen uci_skep=1.08
```

*/\*Put them on the log scale and obtain a standard error by looking at the 95% CI \*/*

```
gen lnopt=log(opt)  
gen seopt=(log(uci_opt)-log(lci_opt))/3.92  
gen lnskep=log(skep)  
gen seskep=(log(uci_skep)-log(lci_skep))/3.92
```

*/\*Simulate 100000 patients within the distributions informed by the point estimate of the log RR and 95% CI and then re-exponentiate to the RR scale\*/*

```
gen sim_opt=rnormal(lnopt,seopt)  
gen sim_skep=rnormal(lnskep,seskep)  
gen esim_opt=exp(sim_opt)  
gen esim_skep=exp(sim_skep)
```

```
/* Estimate the probability density function from the 100000. Go get a coffee if you don't have STATA MP*/
```

```
kdensity esim_skep, generate(x_skep y_skep) n(100000) nograph  
kdensity esim_opt, generate(x_opt y_opt) n(100000) nograph
```

```
/* Create variables needed for the prior probability curves on the log RR scale and convert to the RR scale (skep=weak neutral) */
```

```
gen sim_skep_ref=rnormal(0, 0.355)  
gen esim_skep_ref=exp(sim_skep_ref)  
gen sim_opt_ref=rnormal(-0.41,0.4)  
gen esim_opt_ref=exp(sim_opt_ref)
```

```
/* Integrate the areas under the kernel density functions where any means RR<1 and goal means RR less than or equal to 0.9 */
```

```
integ y_skep x_skep if x_skep<1  
integ y_skep x_skep if x_skep<=0.9  
integ y_opt x_opt if x_opt<1  
integ y_opt x_opt if x_opt<=0.9
```

```
/* Make the plots! */
```

```
twoway (kdensity esim_skep, range (0.0 1.5)) (area y_skep x_skep if x_skep<=0.9) (kdensity esim_skep_ref, range(0.0 1.5)), xline(1,lpattern(dash) lcolor(cranberry)) scheme(scientific) xlabel(0(0.25)1.5) legend(order(2 3 1) label(3 "Prior probability") label(1 "Meta-Analytic Posterior Probability") label(2 "Probability that RR <=0.9 [81.6%]") position(3)) xti(Relative Risk) yti(Probability Density) title("Weak Neutral Prior") xsize(8) ysize(3.5)
```

```
twoway (kdensity esim_opt, range (0.0 1.5)) (area y_opt x_opt if x_opt<=0.9) (kdensity esim_opt_ref, range(0.0 1.5)), xline(1,lpattern(dash) lcolor(cranberry)) scheme(scientific) xlabel(0(0.25)1.5) legend(order(2 3 1) label(3 "Prior probability") label(1 "Meta-Analytic Posterior Probability") label(2 "Probability that RR <=0.9 [89.9%]") position(3)) xti(Relative Risk) yti(Probability Density) title("Moderately Optimistic Prior") xsize(8) ysize(3.5)
```

```
/* Do the same for the frequentist result */
```

```
clear  
set obs 100000  
set seed 8675309  
gen var1=_n  
gen freq=0.75
```

```

gen lci_freq=0.58
gen uci_freq=0.97
gen lnfreq=log(freq)
gen sefreq=(log(uci_freq)-log(lci_freq))/3.92
gen sim_freq=rnormal(lnfreq , sefreq )
gen esim_freq=exp(sim_freq)
kdensity esim_freq, generate(x_freq y_freq) n(100000) nograph k(gaussian)
integ y_freq x_freq if x_freq<1
integ y_freq x_freq if x_freq<=0.9

// Plot

twoway (kdensity esim_freq, range (0 1.5)) (area y_freq x_freq if x_freq<=0.9),
xline(1,lpattern(dash) lcolor(cranberry)) scheme(scientific) xlabel(0(0.25)1.5) legend(order(2 1)
label(1 "Meta-Analytic Probability") label(2 "Probability that RR <=0.9 [91.8%]") position(3))
xti(Relative Risk) yti(Probability Density) title("Frequentist Analysis") xsize(8) ysize(3.5)

```

**eTable.** Details of Randomized Controlled Trials Identified in Search of Registry

| Title                                                                                                                                                                                                                                                | Registration ID(s)                     | Countries         | Outpatient | Maximum Daily Dose and Duration | Comparator       | Status      | Results Available | Included in meta-analysis |
|------------------------------------------------------------------------------------------------------------------------------------------------------------------------------------------------------------------------------------------------------|----------------------------------------|-------------------|------------|---------------------------------|------------------|-------------|-------------------|---------------------------|
| Effect of fluvoxamine on cytokine in COVID-19 patients                                                                                                                                                                                               | IRCT20131115015405N4                   | Iran              | No         | 300mg x Not Specified           | Standard of Care | Completed   | NA                | No                        |
| A Double-blind, Placebo-controlled Clinical Trial of Fluvoxamine for Symptomatic Individuals With COVID-19 Infection (STOP COVID)                                                                                                                    | NCT04342663                            | USA               | Yes        | 300mg x15 days                  | Placebo          | Completed   | Yes               | Yes                       |
| COVID-OUT: Early Outpatient Treatment for SARS-CoV-2 Infection (COVID-19)                                                                                                                                                                            | NCT04510194                            | USA               | Yes        | 100mg x10 days                  | Placebo          | Recruiting  | No                | No                        |
| Fluvoxamine for Early Treatment of Covid-19 (Stop Covid 2)                                                                                                                                                                                           | NCT04668950                            | USA and Canada    | Yes        | 200mg x15 days                  | Placebo          | Completed   | Yes               | Yes                       |
| Fluvoxamine for Adults With Mild to Moderate COVID-19                                                                                                                                                                                                | NCT04711863                            | Republic of Korea | Yes        | 200mg x10days                   | Placebo          | Suspended   | No                | No                        |
| Fluvoxamine Administration in Moderate SARS-CoV-2 (COVID-19) Infected Patients                                                                                                                                                                       | NCT04718480 and EUCTR2020-002299-11-HU | Hungary           | Yes        | 200mg x74 days                  | Placebo          | Recruiting  | No                | No                        |
| Repurposed Approved and Under Development Therapies for Patients With Early-Onset COVID-19 and Mild Symptoms (TOGETHER)                                                                                                                              | NCT04727424                            | Brazil            | Yes        | 200mg x10 days                  | Placebo          | Completed   | Yes               | Yes                       |
| ACTIV-6: COVID-19 Study of Repurposed Medications                                                                                                                                                                                                    | NCT04885530                            | USA               | Yes        | 100mg x10 days                  | Placebo          | Recruiting  | No                | No                        |
| Randomized-controlled Trial of the Effectiveness of COVID-19 Early Treatment in Community                                                                                                                                                            | NCT05087381                            | Thailand          | Yes        | 150mg x14 days                  | Standard of Care | Recruiting  | No                | No                        |
| Effect of Combined Fluvoxamine with Favipiravir versus Favipiravir Monotherapy in Prevention of Clinical Deterioration among mild to moderate COVID-19 patients Monitoring by Telemedicine in Virtual Clinic: Open-label Randomized Controlled Trial | TCTR20210615002                        | Thailand          | Yes        | 200mg x 10 days                 | Favipiravir      | Not Started | NA                | No                        |

**eFigure 1.** Forest Plot of Bayesian Analysis With Weakly Neutral Prior

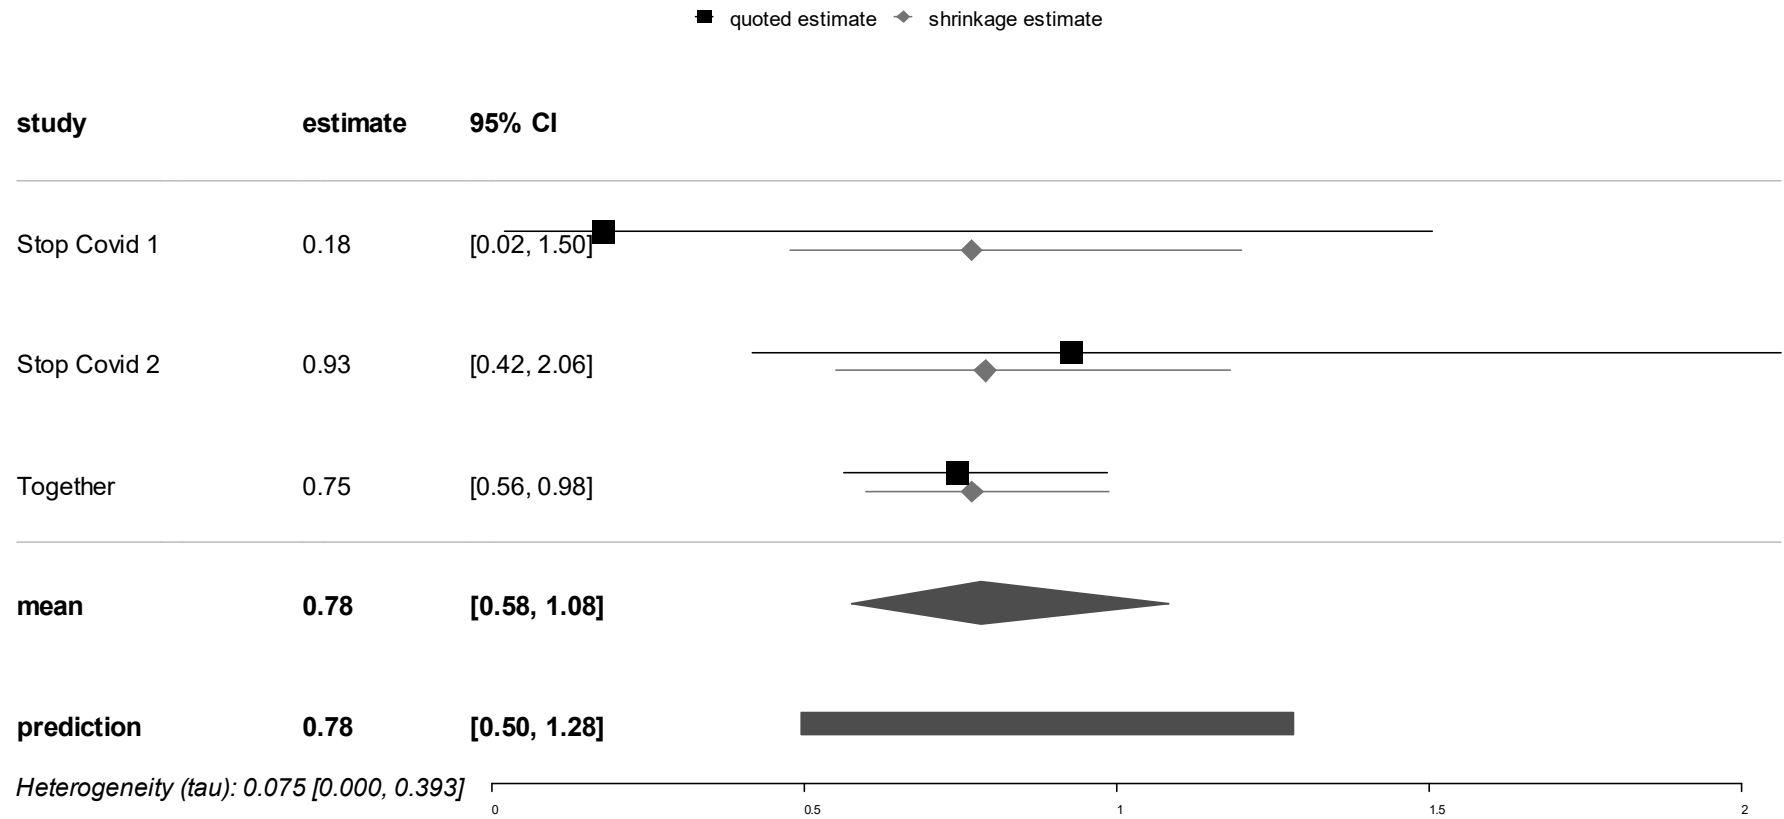

The approximate meta-analytic weights given for the mean effect are: 2.0% for Stop Covid 1, 11.9% for Stop Covid 2, 19.7% given to prior, and 66.3% given to Together

**eFigure 2.** Forest Plot of Bayesian Analysis With Moderately Optimistic Prior

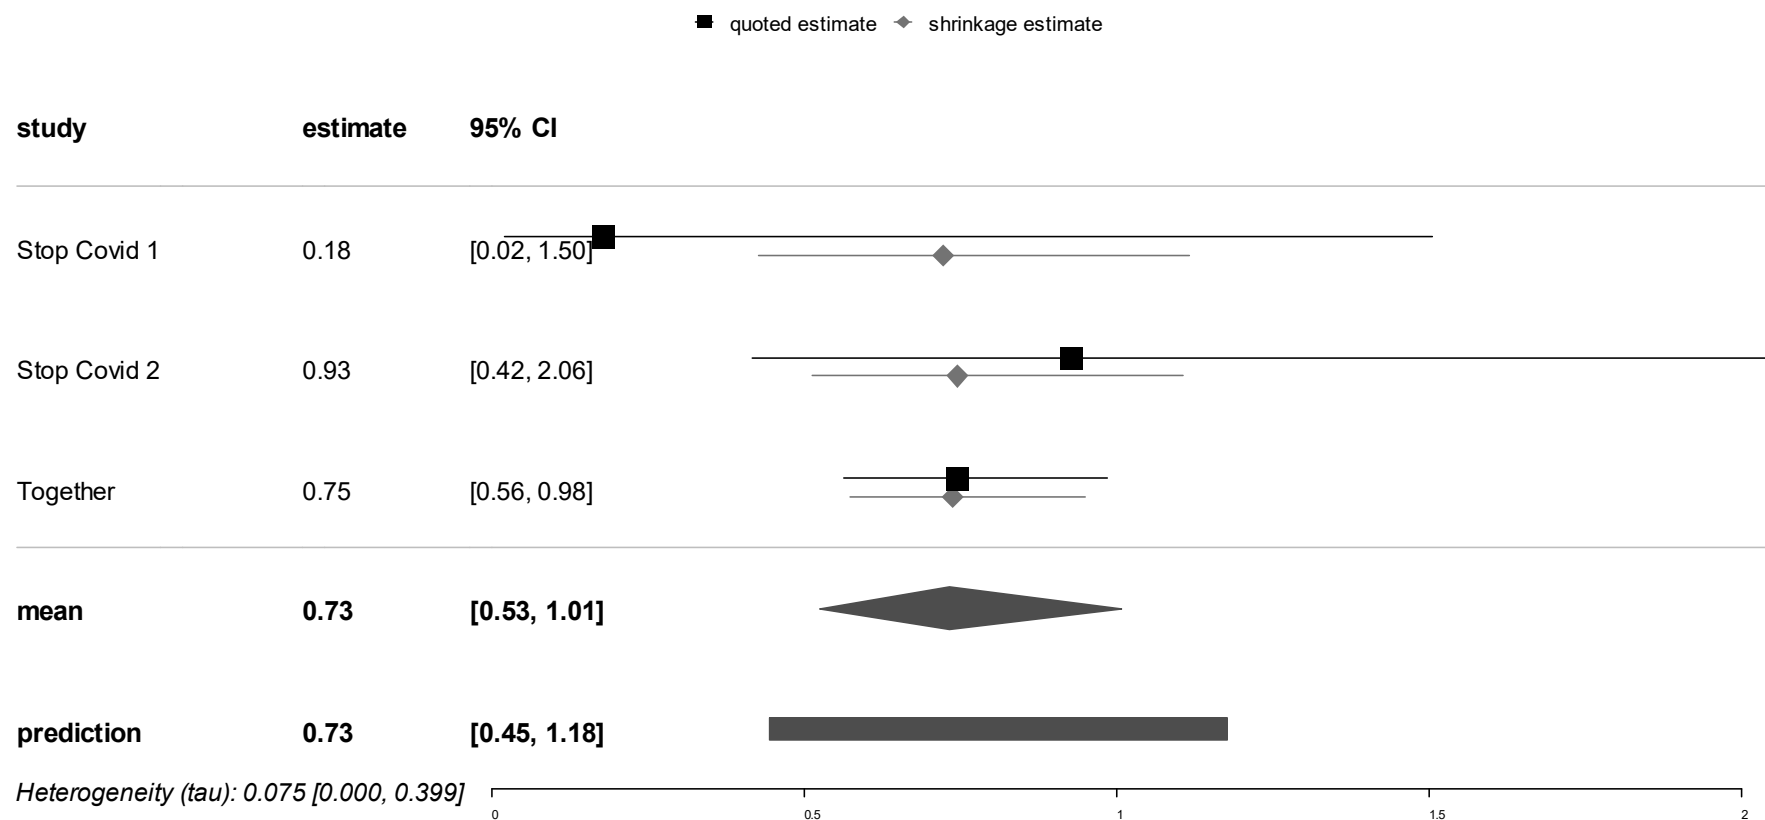

The approximate meta-analytic weights given for the mean effect are: 2.1% for Stop Covid 1, 12.5% for Stop Covid 2, 16.6% given to prior, and 68.8% given to Together



**eTable 2.** Considerations for Relative Contraindications to Fluvoxamine

| Patient Factors                                                                                                                            | Reasoning (if not obvious)                                                                                                                                                                                                                                                                                                                                      |
|--------------------------------------------------------------------------------------------------------------------------------------------|-----------------------------------------------------------------------------------------------------------------------------------------------------------------------------------------------------------------------------------------------------------------------------------------------------------------------------------------------------------------|
| Allergy to fluvoxamine                                                                                                                     |                                                                                                                                                                                                                                                                                                                                                                 |
| Moderate to severe depression within 6 weeks of enrollment                                                                                 | If the patient would need to be switched to fluvoxamine from another agent due to drug-interactions, this would ideally be done with explicit supervision                                                                                                                                                                                                       |
| Previous or current diagnosis of manic depression / bipolar disorder                                                                       | If the patient would need to be switched to fluvoxamine from another agent or if there would be concern that adding fluvoxamine might trigger a manic episode                                                                                                                                                                                                   |
| Hepatic impairment defined as known Cirrhosis of any severity                                                                              | Fluvoxamine metabolism is altered in patients with cirrhosis                                                                                                                                                                                                                                                                                                    |
| Hospitalization for gastrointestinal or other non-traumatic bleeding within the last year                                                  | Fluvoxamine can impact platelet aggregation and these patients were excluded from the trial. This decision could be individualized.                                                                                                                                                                                                                             |
| Concurrent Medications                                                                                                                     |                                                                                                                                                                                                                                                                                                                                                                 |
| Caffeine                                                                                                                                   | Fluvoxamine leads to substantial increases in caffeine levels. In the trial, we encouraged no caffeine for participants. At the very least they were told avoid more than 1 small cup of coffee’s worth of caffeine (and to stop caffeine if they felt it was “too energizing”).                                                                                |
| Patients taking warfarin                                                                                                                   | Increased bleeding risk due to increased AUC of warfarin                                                                                                                                                                                                                                                                                                        |
| Patients taking clopidogrel                                                                                                                | Increased risk of ischemic event due to metabolism                                                                                                                                                                                                                                                                                                              |
| Patients taking 2 or more of the following: aspirin, NSAIDs, ticlopidine, prasugrel, ticagrelor, direct oral anticoagulants                | Assuming NSAIDs cannot be held. Fluvoxamine can impact platelet aggregation and these patients were excluded from the trial. This decision could be individualized.                                                                                                                                                                                             |
| Donepezil                                                                                                                                  | This is a Sigma-1-receptor (S1R) agonist and we excluded patients from the trial given that fluvoxamine was being used for its S1R activity                                                                                                                                                                                                                     |
| Other antidepressant medications                                                                                                           | For any patient already on a tricyclic antidepressant, SSRI, or SNRI, we evaluated whether it could be held or reduced under medical supervision during the time they were prescribed fluvoxamine. If the patient was taking a low dose of another medication (e.g., citalopram 10mg) and there was low risk of serotonin syndrome, concurrent use was allowed. |
| Use within 14 days of an MAO inhibitor [e.g., Isocarboxazid (Marplan), Phenelzine (Nardil), Selegiline (Emsam), Tranylcypromine (Parnate)] | Important drug interactions risking serotonin syndrome                                                                                                                                                                                                                                                                                                          |

| Patient Factors                                                                                                                                     | Reasoning (if not obvious)                                                                                                                     |
|-----------------------------------------------------------------------------------------------------------------------------------------------------|------------------------------------------------------------------------------------------------------------------------------------------------|
| Patients taking astemizole, cisapride, mesoridazine, ramelteon, or terfenadine                                                                      | Contraindicated due to hepatic CYP3A4 interaction                                                                                              |
| Patients taking phenytoin or valproic acid                                                                                                          | Potential interaction leading to seizure                                                                                                       |
| Patients who are taking mirtazapine, melatonin, tramadol, or triptan medications                                                                    | If these drugs could not be held, there was a risk of drug interaction increasing levels of these medicines                                    |
| Participants taking alosetron, clozapine, flutamide, mexiletine, olanzapine, rasagiline, ropinirole, tacrine, theophylline, tizanidine, triamterene | Drugs are primarily metabolized by CYP1A2, which is inhibited by fluvoxamine.                                                                  |
| Diazepam or alprazolam users                                                                                                                        | Due to interactions, we recommend reducing the dose by 25% unless the patient has a known seizure disorder (in which case they were excluded). |
